# Supplementary material
Source: publisher figshare collection journal article supplement (https://gsajournals.figshare.com/ndownloader/files/13273010)
Supplement: Supplementary file 1 [file 13273010]

## Sheet: Input
14-3-3epsilon
14-3-3zeta
Aats-gln
Ac78C
AcCoAS
Act42A
Adgf-A
Akap200
alpha-Est10
alpha-Spec
AnnIX
Arpc3B
aru
Atet
Atf3
Baldspot
bark
beta-Spec
betaTub60D
BI-1
bib
blow
SPARC
bwa
c(3)G
CAH2
cbt
CG10062
CG10103
CG10126
CG10178
Kank
CG10286
CG10433
CG10550
CG10559
CG10621
CG10650
CG10660
cDIP
CG11275
CG1136
CG11791
CG12012
CG12014
CG12290
CG12517
CG12581
CG12730
CG12744
CG13124
CG13321
CG13377
CG13506
CG13510
CG13516
sosie
CG13667
CG13868
CG14227
CG14701
CG14855
AdamTS-A
CG14879
CG15210
CG15211
CG15347
CG15629
CG1572
Drat
CG16700
CG17224
CG17323
CG17625
CG17732
CG18067
CG18268
udd
CG18545
CG18547
CG18744
CG2064
Cg25C
CG2641
CG30069
CG3014
CG30154
CG30197
CG30269
CG30323
CG30345
CG3091
CG3097
CG31373
CG31436
CG31743
CG3191
CG31955
CG32091
CG32850
CG33158
CG33298
CG3348
CG3397
CG34417
CG42394
CG4250
NaPi-III
CG42675
CG4269
CG43078
CG43341
CG4338
CG43462
CG44250
CG44325
CG45050
CG46339
CG4797
CG4839
CG5028
CG5059
CG5255
CG5346
CG5390
CG5597
CG5618
CG5707
caix
CG6231
CG6340
CG6357
CG6409
CG6424
CG6426
plum
CG6891
CG7009
CG7059
CG7133
CG7142
CG7194
CG7497
CG7702
CG7900
CG8369
CG8547
CG8740
Rau
CG9360
CG9372
CG9498
CG9505
CG9743
Bacc
chrb
ckn
cno
cora
CR43790
CR44953
CR6900
cry
Csk
CSN5
cv-c
cwo
Cyp12d1-d
Cyp6a13
defl
desat1
Dic1
Diedel
dm
dome
drl
Dscam1
E(spl)m3-HLH
E(spl)mbeta-HLH
Ect4
edl
Egfr
elB
emp
ena
f
Fas1
Fas2
Fas3
fax
fng
CG32138
Fs
fz2
GABA-B-R2
Galpha73B
Gfat1
Gli
GM10545
Gpo-1
Gr64b
GstO3
GstT4
h
His2B:CG33868
Hmgs
hoe2
Hr96
Hrb27C
Idgf3
Ilp6
Imp
ImpL2
ImpL3
Inx3
Inx7
Irc
Iris
isoQC
jim
kek1
Ptpmeg2
LamC
LanB1
LanB2
Lasp
laza
LpR2
Lrch
m
MadM
Mbs
Mdr49
Men-b
MESR3
metro
MFS16
Mgat2
mid
Mmp2
modSP
mp
msn
Msp300
mthl3
mthl4
mthl8
MtnA
MtnB
Nf-YA
NK7.1
NKAIN
Nmdmc
noc
nord
Npc2b
NT5E-2
Oatp74D
Obp46a
Obp99a
ogre
p130CAS
pain
EbpIII
Pepck
PGRP-LA
PGRP-LC
Phk-3
phm
pico
Pka-C2
Pka-R2
pnt
Ppa
ppk29
Ppn
Prosap
pst
Pvr
rgn
Rho1
RpL30
RpL38
scb
sei
Sema-1b
SH3PX1
Sk1
Smox
Sobp
Socs36E
SP1173
spn-F
Spn42Dd
Src64B
Ssk
stet
Strn-Mlck
stv
sty
Sulf1
Syp
Syx4
Tep4
Thor
Tis11
TotA
TotM
trol
tsl
Tsp42Ed
Tsp42Ee
Uhg5
upd1
ush
vir-1
zip
Zw

## Sheet: Cellular Component_1
Category	Term	Count	%	PValue	Genes	List Total	Pop Hits	Pop Total	Fold Enrichment	Bonferroni	Benjamini	FDR
GOTERM_CC_1	GO:0030054~cell junction	20	6.38978	6.19054e-07	SCB, SSK, BIB, RHO1, MBS, CORA, P130CAS, CNO, CKN, INX3, LASP, ZIP, FAS3, INX7, KANK, OGRE, ENA, CSK, GLI, BARK	234	216	10026	3.96724	1.11429e-05	1.11429e-05	0.000456318
GOTERM_CC_1	GO:0044420~extracellular matrix component	5	1.59744	0.000236864	CG25C, PPN, LANB2, LANB1, TROL	234	14	10026	15.3022	0.00425499	0.00212976	0.174467
GOTERM_CC_1	GO:0044421~extracellular region part	31	9.90415	0.000785625	DIEDEL, ILP6, IMPL2, CG10433, TOTM, CG3097, 14-3-3ZETA, SOSIE, SPN42DD, CG25C, PPN, TROL, TOTA, CG18067, 14-3-3EPSILON, UPD1, LANB2, CG6426, LANB1, ADGF-A, SPARC, ADAMTS-A, FAS1, CG6357, SULF1, NPC2B, PHM, PHK-3, SRC64B, CG1136, TEP4	234	699	10026	1.90019	0.0140472	0.0047045	0.577655
GOTERM_CC_1	GO:0005576~extracellular region	42	13.4185	0.00217216	DIEDEL, ILP6, IMPL2, CG10433, OBP99A, TOTM, CG3097, 14-3-3ZETA, EBPIII, SOSIE, FS, SPN42DD, CG25C, PPN, TROL, CG5390, TOTA, CG18067, 14-3-3EPSILON, UPD1, LANB2, CG6426, LANB1, ADGF-A, TSL, SPARC, CG30197, ADAMTS-A, FAS1, CG6357, ISOQC, OBP46A, IDGF3, SULF1, PHM, NPC2B, PHK-3, CG3348, SRC64B, CG1136, KEK1, TEP4	234	1124	10026	1.60101	0.0383853	0.00973763	1.59011
GOTERM_CC_1	GO:0016020~membrane	113	36.1022	0.00501841	PVR, NT5E-2, CG13516, CG30269, 14-3-3ZETA, DSCAM1, IRIS, MMP2, CG42394, CG17323, LPR2, CG7702, MDR49, CYP12D1-D, PKA-R2, FAX, EGFR, CV-C, OATP74D, CG14855, GABA-B-R2, MGAT2, CG4797, MSP300, KEK1, TSP42EE, TSP42ED, CG16700, DESAT1, SK1, SH3PX1, FNG, M, CG33298, CORA, AC78C, LAMC, MFS16, CG32091, BARK, 14-3-3EPSILON, SCB, SSK, LRCH, RHO1, CG10062, EMP, CG11791, ATET, BI-1, PHM, MTHL8, OGRE, CYP6A13…	234	3974	10026	1.21832	0.0865794	0.0179487	3.64058
GOTERM_CC_1	GO:0044425~membrane part	102	32.5879	0.00795008	PVR, NT5E-2, CG13516, 14-3-3ZETA, CG30269, DSCAM1, IRIS, MMP2, CG42394, CG17323, LPR2, CG7702, MDR49, EGFR, CV-C, OATP74D, CG14855, GABA-B-R2, MGAT2, CG4797, MSP300, KEK1, TSP42EE, TSP42ED, CG16700, DESAT1, SH3PX1, FNG, M, CORA, CG33298, AC78C, MFS16, CG32091, BARK, SCB, SSK, LRCH, RHO1, CG10062, EMP, CG11791, ATET, BI-1, PHM, MTHL8, OGRE, CYP6A13, SRC64B, GLI, MTHL3, PGRP-LC, MTHL4, PGRP-LA, CG1…	234	3567	10026	1.22521	0.133829	0.0236611	5.71386
GOTERM_CC_1	GO:0031012~extracellular matrix	11	3.51438	0.0301402	ADAMTS-A, UPD1, FAS1, CG25C, PPN, LANB2, LANB1, TROL, MP, SPARC, MMP2	234	217	10026	2.17192	0.42355	0.0756785	20.1953
GOTERM_CC_1	GO:0045202~synapse	13	4.15335	0.0978644	SH3PX1, ALPHA-EST10, ALPHA-SPEC, SYX4, BETA-SPEC, SYP, PROSAP, FAS2, ARU, FAS3, METRO, ENA, GLI	234	339	10026	1.64307	0.843364	0.206839	53.1943

## Sheet: Cellular Component_2
Category	Term	Count	%	PValue	Genes	List Total	Pop Hits	Pop Total	Fold Enrichment	Bonferroni	Benjamini	FDR
GOTERM_CC_2	GO:0005605~basal lamina	2	0.638978	0.0906282	LANB2, LANB1	226	4	9588	21.2124	0.999115	0.296372	63.0036
GOTERM_CC_2	GO:0005604~basement membrane	5	1.59744	0.000178724	CG25C, PPN, LANB2, LANB1, TROL	226	13	9588	16.3172	0.0131397	0.00264186	0.186907
GOTERM_CC_2	GO:0071212~subsynaptic reticulum	3	0.958466	0.0139844	SH3PX1, METRO, ENA	226	8	9588	15.9093	0.647304	0.0717362	13.7054
GOTERM_CC_2	GO:0044420~extracellular matrix component	5	1.59744	0.000245628	CG25C, PPN, LANB2, LANB1, TROL	226	14	9588	15.1517	0.0180144	0.00302519	0.256792
GOTERM_CC_2	GO:0030055~cell-substrate junction	6	1.91693	0.00141744	SCB, CKN, LASP, KANK, P130CAS, CNO	226	36	9588	7.0708	0.0996437	0.00949686	1.47367
GOTERM_CC_2	GO:0005911~cell-cell junction	14	4.47284	2.28583e-07	SSK, RHO1, MBS, CORA, CNO, INX3, FAS3, ZIP, INX7, OGRE, ENA, GLI, CSK, BARK	226	93	9588	6.38653	1.6915e-05	5.63836e-06	0.00023925
GOTERM_CC_2	GO:0045171~intercellular bridge	4	1.27796	0.0297454	14-3-3ZETA, SRC64B, SOSIE, 14-3-3EPSILON	226	29	9588	5.85169	0.892961	0.130346	27.0985
GOTERM_CC_2	GO:0070161~anchoring junction	10	3.19489	0.000271284	SCB, CKN, LASP, FAS3, KANK, BIB, ENA, P130CAS, CNO, BARK	226	91	9588	4.66206	0.0198775	0.00286414	0.28358
GOTERM_CC_2	GO:0005578~proteinaceous extracellular matrix	9	2.8754	0.000650199	ADAMTS-A, UPD1, FAS1, CG25C, PPN, LANB2, LANB1, TROL, SPARC	226	82	9588	4.65638	0.0469904	0.00533354	0.678452
GOTERM_CC_2	GO:0031594~neuromuscular junction	6	1.91693	0.0253348	SYP, PROSAP, FAS2, FAS3, ALPHA-SPEC, BETA-SPEC	226	71	9588	3.58519	0.850271	0.11891	23.5542
GOTERM_CC_2	GO:0098590~plasma membrane region	16	5.11182	0.000545281	SCB, SH3PX1, CV-C, SSK, DOME, RHO1, ALPHA-SPEC, M, SYX4, SOSIE, BETA-SPEC, INX3, FAS2, FAS3, OGRE, PGRP-LC	226	241	9588	2.81658	0.0395581	0.00503251	0.569257
GOTERM_CC_2	GO:0045177~apical part of cell	8	2.55591	0.0382459	SCB, UPD1, ZIP, DOME, RHO1, M, MBS, SOSIE	226	134	9588	2.53282	0.944186	0.156124	33.513
GOTERM_CC_2	GO:0009986~cell surface	7	2.23642	0.0650733	ZIP, LRCH, ALPHA-EST10, SULF1, GLI, CAH2, MMP2	226	121	9588	2.45433	0.993121	0.23054	50.5532
GOTERM_CC_2	GO:0044459~plasma membrane part	43	13.738	2.56129e-06	SH3PX1, NAPI-III, DOME, BIB, ALPHA-EST10, DSCAM1, SYX4, M, SOSIE, MMP2, BETA-SPEC, INX3, SEMA-1B, MDR49, CG6231, CSK, CAH2, SCB, SEI, LAZA, SSK, CV-C, RHO1, OATP74D, ALPHA-SPEC, EMP, DRL, CG14855, GABA-B-R2, FZ2, FAS2, FAS3, CG4797, MSP300, OGRE, SRC64B, GLI, CG7497, PGRP-LC, KEK1, TSP42EE, PGRP-LA, TSP42ED	226	852	9588	2.14116	0.000189518	4.73829e-05	0.00268079
GOTERM_CC_2	GO:0071944~cell periphery	74	23.6422	2.71152e-10	PVR, NAPI-III, ALPHA-EST10, 14-3-3ZETA, DSCAM1, SYX4, CG12517, MBS, CNO, MMP2, BETA-SPEC, INX3, LPR2, ZIP, NKAIN, SEMA-1B, INX7, MDR49, MSN, CSK, PKA-R2, FAX, EGFR, SEI, CV-C, AKAP200, GR64B, OATP74D, STY, CG14855, GABA-B-R2, MADM, FAS1, FAS2, FAS3, CG4797, MSP300, KEK1, TSP42EE, TSP42ED, SK1, SH3PX1, DOME, BIB, M, CORA, CG33298, SOSIE, AC78C, CG4839, CG6231, BARK, CAH2, CG32091, 14-3-3EPSILON, S…	226	1514	9588	2.0736	2.00652e-08	2.00652e-08	2.83806e-07
GOTERM_CC_2	GO:0005886~plasma membrane	67	21.4058	3.58502e-09	PVR, NAPI-III, ALPHA-EST10, 14-3-3ZETA, DSCAM1, SYX4, MMP2, BETA-SPEC, INX3, LPR2, NKAIN, SEMA-1B, INX7, MDR49, CSK, PKA-R2, FAX, EGFR, SEI, CV-C, AKAP200, GR64B, OATP74D, STY, CG14855, GABA-B-R2, FAS1, FAS2, FAS3, CG4797, MSP300, KEK1, TSP42EE, TSP42ED, SK1, SH3PX1, DOME, BIB, M, CORA, CG33298, SOSIE, AC78C, CG4839, CG6231, BARK, CAH2, CG32091, 14-3-3EPSILON, SCB, LAZA, SSK, RHO1, ALPHA-SPEC, EM…	226	1376	9588	2.06574	2.65291e-07	1.32646e-07	3.75233e-06
GOTERM_CC_2	GO:0044421~extracellular region part	31	9.90415	0.000901996	DIEDEL, ILP6, IMPL2, CG10433, TOTM, CG3097, 14-3-3ZETA, SOSIE, SPN42DD, CG25C, PPN, TROL, TOTA, CG18067, 14-3-3EPSILON, UPD1, LANB2, CG6426, LANB1, ADGF-A, SPARC, ADAMTS-A, FAS1, CG6357, SULF1, NPC2B, PHM, PHK-3, SRC64B, CG1136, TEP4	226	699	9588	1.8815	0.064597	0.00665554	0.940071
GOTERM_CC_2	GO:0005615~extracellular space	21	6.70927	0.0644375	ILP6, DIEDEL, UPD1, CG10433, IMPL2, TOTM, CG6426, CG3097, ADGF-A, SPARC, FAS1, SPN42DD, CG6357, SULF1, PHM, NPC2B, PHK-3, TOTA, CG18067, CG1136, TEP4	226	593	9588	1.5024	0.992766	0.239539	50.2001
GOTERM_CC_2	GO:0031224~intrinsic component of membrane	93	29.7125	0.00541794	PVR, CG15211, NAPI-III, CG12012, CG13516, NT5E-2, ALPHA-EST10, CG30269, 14-3-3ZETA, HOE2, DSCAM1, IRIS, BALDSPOT, SYX4, DIC1, CG43078, MMP2, STET, INX3, CG17323, CG42394, LPR2, NKAIN, INX7, CG7702, SEMA-1B, CG1572, CG10550, MDR49, CG31743, CG5059, EGFR, CG12290, SEI, GR64B, CG12730, OATP74D, SP1173, CG14855, GABA-B-R2, CG44325, ADAMTS-A, BWA, MGAT2, FAS1, FAS2, FAS3, CG43341, CG4797, PPK29, MSP30…	226	3133	9588	1.25934	0.331031	0.0329465	5.52756
GOTERM_CC_2	GO:0044425~membrane part	102	32.5879	0.0100931	PVR, NT5E-2, CG13516, 14-3-3ZETA, CG30269, DSCAM1, IRIS, MMP2, CG42394, CG17323, LPR2, CG7702, MDR49, EGFR, CV-C, OATP74D, CG14855, GABA-B-R2, MGAT2, CG4797, MSP300, KEK1, TSP42EE, TSP42ED, CG16700, DESAT1, SH3PX1, FNG, M, CORA, CG33298, AC78C, MFS16, CG32091, BARK, SCB, SSK, LRCH, RHO1, CG10062, EMP, CG11791, ATET, BI-1, PHM, MTHL8, OGRE, CYP6A13, SRC64B, GLI, MTHL3, PGRP-LC, MTHL4, PGRP-LA, CG1…	226	3567	9588	1.21316	0.527958	0.0561095	10.0736

## Sheet: Biological Process_1
Category	Term	Count	%	PValue	Genes	List Total	Pop Hits	Pop Total	Fold Enrichment	Bonferroni	Benjamini	FDR
GOTERM_BP_1	GO:0040011~locomotion	46	14.6965	5.08939e-11	PVR, PTPMEG2, DOME, DSCAM1, PNT, BETATUB60D, SOSIE, CRY, MMP2, MID, BETA-SPEC, SOCS36E, ZIP, SEMA-1B, MDR49, TROL, SMOX, MSN, CSK, PKA-R2, HRB27C, 14-3-3EPSILON, SCB, UPD1, EGFR, LAZA, CV-C, RHO1, LANB1, ALPHA-SPEC, MP, DRL, ADAMTS-A, CKN, FZ2, FAS1, FAS2, FAS3, SULF1, PAIN, PHM, MSP300, ENA, SRC64B, GLI, CSN5	255	666	10996	2.97837	1.11966e-09	1.11966e-09	3.98313e-08
GOTERM_BP_1	GO:0050896~response to stimulus	124	39.6166	5.67454e-11	PVR, IMPL2, CG13516, NOC, 14-3-3ZETA, DSCAM1, PNT, CG12517, CNO, MMP2, ZIP, BACC, MDR49, RGN, SMOX, CYP12D1-D, PKA-R2, CG13510, EGFR, UPD1, PICO, CV-C, MESR3, E(SPL)M3-HLH, ADGF-A, MP, GABA-B-R2, MADM, HR96, MTNA, MTNB, IMP, EDL, KEK1, TSP42EE, TSP42ED, DESAT1, SH3PX1, CG13377, FNG, CG33298, BETATUB60D, H, VIR-1, AC78C, FS, SPN42DD, ARU, BARK, 14-3-3EPSILON, SCB, RHO1, LANB1, TSL, MODSP, ATF3, BI…	255	3215	10996	1.66316	1.2484e-09	6.242e-10	4.4411e-08
GOTERM_BP_1	GO:0023052~signaling	80	25.5591	4.33709e-07	ILP6, PVR, IMPL2, CG13516, NOC, ALPHA-EST10, 14-3-3ZETA, SYX4, PNT, HMGS, CG12517, CNO, CRY, MMP2, BETA-SPEC, NF-YA, SOCS36E, SYP, SEMA-1B, TROL, SMOX, MSN, CSK, CG5059, UPD1, EGFR, CG12290, PICO, CV-C, MESR3, AKAP200, STV, E(SPL)M3-HLH, STY, MP, GABA-B-R2, RAU, MADM, HR96, ECT4, CKN, FAS2, EDL, ELB, KEK1, TSP42EE, TSP42ED, DIEDEL, SH3PX1, DOME, BIB, FNG, H, AC78C, FS, HRB27C, 14-3-3EPSILON, SCB,…	255	2013	10996	1.71372	9.54155e-06	3.18053e-06	0.000339435
GOTERM_BP_1	GO:0032501~multicellular organismal process	157	50.1597	9.21456e-07	PVR, IMPL2, NOC, 14-3-3ZETA, DSCAM1, IRIS, MEN-B, PNT, HMGS, CG12517, CG31955, CNO, MMP2, SYP, LPR2, ZIP, MDR49, CG30069, BACC, SMOX, PKA-R2, FAX, UPD1, EGFR, CG6340, PICO, CWO, CV-C, E(SPL)M3-HLH, SPN-F, ADGF-A, MP, P130CAS, JIM, CG13321, IMP, LASP, EDL, CG32138, MSP300, KEK1, CG16700, AATS-GLN, DESAT1, F, PTPMEG2, CG13377, CG10126, FNG, M, BETATUB60D, CORA, H, PKA-C2, AC78C, SPN42DD, CG25C, ARU…	255	5110	10996	1.32487	2.02718e-05	5.068e-06	0.00072116
GOTERM_BP_1	GO:0032502~developmental process	131	41.853	9.50501e-07	PVR, IMPL2, IMPL3, NOC, 14-3-3ZETA, DSCAM1, PNT, HMGS, CG12517, CNO, MMP2, SYP, LPR2, ZIP, CG30069, RGN, SMOX, PKA-R2, FAX, EGFR, UPD1, PICO, CWO, CV-C, E(SPL)M3-HLH, SPN-F, ADGF-A, MP, P130CAS, JIM, IMP, CG13321, LASP, EDL, CG32138, MSP300, KEK1, CG16700, DESAT1, AATS-GLN, F, PTPMEG2, CG13377, CG10126, FNG, M, BETATUB60D, CORA, H, PKA-C2, CG25C, PPN, LAMC, BARK, 14-3-3EPSILON, SCB, CG8369, SSK, …	255	4013	10996	1.40766	2.09108e-05	4.1822e-06	0.000743892
GOTERM_BP_1	GO:0040007~growth	29	9.26518	3.77905e-06	DESAT1, ILP6, DSCAM1, SYX4, MBS, CNO, BETA-SPEC, SYP, RPL30, METRO, SEMA-1B, RGN, CSK, 14-3-3EPSILON, SCB, PICO, RHO1, ALPHA-SPEC, TSL, FZ2, PROSAP, IMP, FAS2, CG32138, THOR, ENA, SRC64B, PLUM, CHRB	255	469	10996	2.66637	8.31357e-05	1.38564e-05	0.00295757
GOTERM_BP_1	GO:0051704~multi-organism process	66	21.0863	1.05678e-05	PVR, TOTM, NOC, 14-3-3ZETA, DSCAM1, BALDSPOT, SYX4, PNT, EBPIII, CG12517, MBS, MMP2, SOCS36E, SYP, CG17323, ZIP, BACC, MDR49, TOTA, MSN, CSK, UPD1, EGFR, STY, SPN-F, ADAMTS-A, IMP, CG9372, FAS3, LASP, MSP300, PAIN, PPK29, PHK-3, KEK1, DESAT1, DIEDEL, CG10433, PTPMEG2, CG13377, DOME, BIB, FNG, SOSIE, MID, VIR-1, SPN42DD, HRB27C, CG12744, 14-3-3EPSILON, SCB, RHO1, LANB1, ALPHA-SPEC, PHM, THOR, ENA,…	255	1677	10996	1.69709	0.000232465	3.32126e-05	0.0082704
GOTERM_BP_1	GO:0065007~biological regulation	131	41.853	3.76689e-05	PVR, IMPL2, CG13516, NOC, 14-3-3ZETA, DSCAM1, MEN-B, PNT, CG12517, CNO, MMP2, SYP, LPR2, ZIP, SMOX, PKA-R2, EGFR, UPD1, PICO, CWO, CV-C, MESR3, E(SPL)M3-HLH, SPN-F, ADGF-A, MP, P130CAS, MADM, GABA-B-R2, JIM, HR96, MTNA, MTNB, IMP, LASP, EDL, MSP300, KEK1, TSP42EE, TSP42ED, DESAT1, SH3PX1, FNG, M, CG33298, CORA, H, AC78C, FS, SPN42DD, CG25C, ARU, STRN-MLCK, TIS11, LAMC, BARK, 14-3-3EPSILON, SCB, N…	255	4274	10996	1.3217	0.000828387	0.000103586	0.0294772
GOTERM_BP_1	GO:0002376~immune system process	27	8.6262	4.3187e-05	DIEDEL, PVR, DOME, TOTM, PNT, MMP2, VIR-1, SPN42DD, CG1572, TOTA, CSK, UPD1, EGFR, RHO1, LANB1, ADGF-A, ECT4, FZ2, MODSP, CG6357, ATF3, THOR, USH, SRC64B, PGRP-LC, CSN5, PGRP-LA	255	478	10996	2.43574	0.000949683	0.000105565	0.0337946
GOTERM_BP_1	GO:0007610~behavior	37	11.8211	4.90065e-05	DESAT1, CG10433, ACCOAS, OBP99A, CG13377, DOME, NOC, 14-3-3ZETA, EBPIII, SYX4, BETATUB60D, MBS, CRY, SOCS36E, CG17323, ARU, INX7, BACC, PKA-R2, SCB, UPD1, EGFR, AKAP200, PST, RHO1, DRL, SPARC, GPO-1, GABA-B-R2, NORD, FAS2, FAS3, PHM, PPK29, PAIN, OGRE, SRC64B	255	780	10996	2.04551	0.00107759	0.000107811	0.0383478
GOTERM_BP_1	GO:0022610~biological adhesion	17	5.43131	0.000294244	SCB, EGFR, IMPL2, BIB, LANB2, ALPHA-EST10, LANB1, M, MP, CORA, SPARC, P130CAS, FAS1, FAS2, FAS3, SRC64B, GLI	255	256	10996	2.86354	0.00645341	0.000588402	0.230055
GOTERM_BP_1	GO:0050789~regulation of biological process	116	37.0607	0.000474252	PVR, IMPL2, CG13516, NOC, 14-3-3ZETA, DSCAM1, MEN-B, PNT, CG12517, CNO, MMP2, SYP, LPR2, ZIP, SMOX, PKA-R2, EGFR, UPD1, PICO, CV-C, MESR3, CWO, E(SPL)M3-HLH, SPN-F, ADGF-A, MP, GABA-B-R2, MADM, JIM, HR96, IMP, LASP, EDL, KEK1, TSP42EE, TSP42ED, DESAT1, SH3PX1, FNG, M, H, AC78C, FS, SPN42DD, STRN-MLCK, TIS11, LAMC, 14-3-3EPSILON, SCB, NK7.1, RHO1, LANB1, TSL, ATF3, ARPC3B, BI-1, UDD, MTHL8, OGRE, …	255	3864	10996	1.29454	0.0103817	0.000869289	0.370565
GOTERM_BP_1	GO:0044699~single-organism process	201	64.2173	0.00088425	PVR, NT5E-2, CG13516, NOC, MEN-B, DSCAM1, IRIS, SYP, ZIP, CG30069, SMOX, PKA-R2, FAX, UPD1, CAIX, MESR3, CV-C, CWO, OATP74D, E(SPL)M3-HLH, SPN-F, ADGF-A, P130CAS, IMP, CG13321, MGAT2, CG32138, CG4797, MSP300, KEK1, TSP42EE, TSP42ED, SK1, DESAT1, F, CG10126, M, H, PKA-C2, AC78C, FS, ARU, LAMC, MFS16, 14-3-3EPSILON, SCB, CG8369, BLOW, C(3)G, EMP, BI-1, PHM, OGRE, ENA, SRC64B, PGRP-LC, NAPI-III, HOE…	255	7686	10996	1.12769	0.0192739	0.00149596	0.689959
GOTERM_BP_1	GO:0051179~localization	75	23.9617	0.00306059	PVR, CG10103, CG3091, IMPL2, NAPI-III, CG3191, HOE2, DSCAM1, SYX4, PNT, CNO, DIC1, CRY, NF-YA, SOCS36E, INX3, LPR2, ZIP, NKAIN, INX7, SEMA-1B, MDR49, MSN, CSK, CG5059, UPD1, EGFR, SEI, CV-C, PST, OATP74D, SPN-F, P130CAS, CG14855, GABA-B-R2, MADM, ADAMTS-A, EDL, LASP, CG4797, MSP300, PAIN, PPK29, CG16700, SH3PX1, PTPMEG2, OBP99A, DOME, BIB, CORA, CG33298, SOSIE, CG30345, CG6231, LAMC, MFS16, BARK,…	255	2388	10996	1.35432	0.0652126	0.00480529	2.37045
GOTERM_BP_1	GO:0000003~reproduction	56	17.8914	0.0263197	PVR, 14-3-3ZETA, BALDSPOT, PNT, EBPIII, CG12517, MBS, MMP2, BETA-SPEC, SOCS36E, SYP, ZIP, MDR49, MSN, CG18067, CSK, UPD1, EGFR, CG6426, SPN-F, STY, ADAMTS-A, IMP, FAS2, FAS3, LASP, PAIN, MSP300, PPK29, KEK1, DESAT1, CG10433, PTPMEG2, DOME, BIB, FNG, SOSIE, MID, SPN42DD, CG25C, HRB27C, 14-3-3EPSILON, SCB, RHO1, LANB1, ALPHA-SPEC, C(3)G, FZ2, PHM, NPC2B, ENA, SRC64B, GLI, CSN5, TEP4	255	1853	10996	1.30319	0.44389	0.038364	18.8399
GOTERM_BP_1	GO:0022414~reproductive process	50	15.9744	0.0279562	DESAT1, PVR, CG10433, PTPMEG2, DOME, BIB, 14-3-3ZETA, FNG, BALDSPOT, PNT, EBPIII, MBS, CG12517, SOSIE, MID, MMP2, BETA-SPEC, SOCS36E, SYP, CG25C, ZIP, MDR49, MSN, CSK, HRB27C, 14-3-3EPSILON, EGFR, UPD1, SCB, RHO1, LANB1, STY, SPN-F, C(3)G, ALPHA-SPEC, ADAMTS-A, FZ2, IMP, FAS2, FAS3, LASP, PHM, PPK29, MSP300, PAIN, ENA, SRC64B, GLI, CSN5, KEK1	255	1625	10996	1.32682	0.464095	0.0382371	19.9014
